# Supplementary material for: Absence of Polymorphisms in Codons 167, 198 and 200 of All Seven β-Tubulin Isotypes of Benzimidazole Susceptible and Resistant Parascaris spp. Specimens from Australia
Source: MDPI journal article supplement (doi:10.3390/pathogens11050490), 2022-04-20
Supplement: s1 [file s1]

**Table S2.** Transcripts in the *Ascaris suum* genome (PRJNA62057) encoding proteins with high identity to isotype 1  $\beta$ -tubulin from *Haemonchus contortus*

| Transcript ID <sup>a</sup> | Nomenclature<br>Roose et al.<br>[43] | Nomenclature<br>Martin et al.<br>[16] | Annotated C.<br><i>elegans</i><br>ortholog <sup>b</sup> | Length<br>(bp/aa <sup>c</sup> ) | Query<br>coverage <sup>d</sup> (%) | Identity <sup>d</sup><br>(%) | Similarity <sup>e</sup><br>(%) | Location<br>genome <sup>f</sup>                                                                                                                                                | Location<br>cDNA <sup>f</sup> |
|----------------------------|--------------------------------------|---------------------------------------|---------------------------------------------------------|---------------------------------|------------------------------------|------------------------------|--------------------------------|--------------------------------------------------------------------------------------------------------------------------------------------------------------------------------|-------------------------------|
| AgB01_g251_t03             | bt-F                                 | tbb-3                                 | <i>mec-7</i>                                            | 1329/443                        | 95                                 | 91.6                         | 96.3                           | AgB01:<br>3782705 –<br>3795903 (-)                                                                                                                                             |                               |
| AgB01_g252_t02             | bt-E                                 | tbb-4                                 | <i>tbb-4</i>                                            | 1335/444                        | 97                                 | 90.8                         | 96.6                           | AgB01:<br>3803075-<br>3814443 (-)                                                                                                                                              |                               |
| AgB02_g235_t03             | <i>bt-A</i>                          | <i>tbb-5</i>                          | n.a.                                                    | 1353/450                        | 98                                 | 93.2                         | 97.7                           | AgB02:<br>3973132-<br>3980469 (+)                                                                                                                                              |                               |
| AgE31_g003_t01             | bt-C                                 | tbb-6                                 | n.a.                                                    | 1941/646                        | 100                                | 86.4                         | 94.6                           | AgE31:35111<br>- 46174 (+)                                                                                                                                                     |                               |
| AgE31_g003_t01me           | bt-C                                 | tbb-6                                 | n.a.                                                    | 1641/546                        | 97                                 | 87.8                         | 95.9                           | AgE31:<br>35111 -<br>35167 (+)<br>35988 -<br>36096 (+)<br>36896 -<br>37122 (+)<br>37774 -<br>37902 (+)<br>38297 -<br>38459 (+)<br>38927 -<br>39117 (+)<br>39342 –<br>39437 (+) |                               |

[illegible]

|                 |      |       |      |              |    |      |      |                                                                                                                                                                                                                                                                                                                                                                                    |
|-----------------|------|-------|------|--------------|----|------|------|------------------------------------------------------------------------------------------------------------------------------------------------------------------------------------------------------------------------------------------------------------------------------------------------------------------------------------------------------------------------------------|
| AgR043_g091_t01 | bt-D | tbb-7 | n.a. | 1356/452     | 99 | 80.9 | 91.3 | AgR043:<br>1472802 -<br>1487383                                                                                                                                                                                                                                                                                                                                                    |
| n.a.            | bt-G | tbb-9 | n.a. | 1425/47485.5 | 99 | 82   | 91   | CM024173.1:<br>10203269 - 1 - 57<br>10203325 (+)<br>10204246 - 58 - 166<br>10204354 (+)<br>10204989 - 167 - 394<br>10205216 (+)<br>10206197 - 395 - 422<br>10206324 (+)<br>10206637 - 423 - 585<br>10206799 (+)<br>10207440 - 586 - 776<br>10207630 (+)<br>10209713 - 777 - 872<br>10209808 (+)<br>10209991 - 873 - 1059<br>10210177 (+)<br>10211570 - 1060 - 1425<br>10211835 (+) |

---

<sup>a</sup>For each locus, only the best matching transcript was included.

<sup>b</sup>Annotated *Caenorabditis elegans* ortholog in WormBase ParaSite

<sup>c</sup>Coding sequence including stop codon in base pairs/amino acids

<sup>d</sup>Using *Haemonchus contortus* isotype 1  $\beta$ -tubulin as query in a TBLASTN search.

<sup>e</sup>Based on the BLOSUM62 similarity matrix.

<sup>f</sup>Details for individual exons are only provided if a different gene model than in the genome annotation was used.

<sup>g</sup>Version after manually editing the cDNA sequence.

n.a., not available
