# Supplementary material for: Absence of Polymorphisms in Codons 167, 198 and 200 of All Seven β-Tubulin Isotypes of Benzimidazole Susceptible and Resistant Parascaris spp. Specimens from Australia
Source: MDPI journal article supplement (doi:10.3390/pathogens11050490), 2022-04-20
Supplement: s1 [file s1]

**Table S6.** Substitution model for phylogenetic reconstruction based on codon positions 1 and 2.

| Model of substitution                                |               | TIM2e+G4   |        |         |        |
|------------------------------------------------------|---------------|------------|--------|---------|--------|
| Rate parameter                                       |               | R:         |        |         |        |
| A-C:                                                 |               | 16.512     |        |         |        |
| A-G:                                                 |               | 20.759     |        |         |        |
| A-T:                                                 |               | 16.512     |        |         |        |
| C-G:                                                 |               | 10.000     |        |         |        |
| C-T:                                                 |               | 26.170     |        |         |        |
| G-T:                                                 |               | 10.000     |        |         |        |
| State frequencies: (equal frequencies)               |               |            |        |         |        |
| Rate matrix Q                                        |               |            |        |         |        |
|                                                      | A             | -1.076     | 0.3304 | 0.4154  | 0.3304 |
|                                                      | C             | 0.3304     | -1.054 | 0.2001  | 0.5236 |
|                                                      | G             | 0.4154     | 0.2001 | -0.8156 | 0.2001 |
|                                                      | T             | 0.3304     | 0.5236 | 0.2001  | -1.054 |
| Model of rate heterogeneity: Gamma with 4 categories |               |            |        |         |        |
| Gamma shape alpha:                                   |               | 0.2535     |        |         |        |
| Category                                             | Relative rate | Proportion |        |         |        |
| 1                                                    | 0.002281      | 0.25       |        |         |        |
| 2                                                    | 0.06927       | 0.25       |        |         |        |
| 3                                                    | 0.5089        | 0.25       |        |         |        |
| 4                                                    | 3.42          | 0.25       |        |         |        |

Relative rates are computed as MEAN of the portion of the Gamma distribution falling in the category.
