# Supplementary material for: Absence of Polymorphisms in Codons 167, 198 and 200 of All Seven β-Tubulin Isotypes of Benzimidazole Susceptible and Resistant Parascaris spp. Specimens from Australia
Source: MDPI journal article supplement (doi:10.3390/pathogens11050490), 2022-04-20
Supplement: s1 [file s1]

**Table S4.** Substitution model used for phylogenetic reconstruction based on protein sequences

| Model of substitution         |                  | LG+R3      |
|-------------------------------|------------------|------------|
| Substitution<br>rate category | Relative<br>rate | Proportion |
| 1                             | 0.2110           | 0.7105     |
| 2                             | 19.862           | 0.2390     |
| 3                             | 74.250           | 0.0506     |
