# Supplementary material for: Absence of Polymorphisms in Codons 167, 198 and 200 of All Seven β-Tubulin Isotypes of Benzimidazole Susceptible and Resistant Parascaris spp. Specimens from Australia
Source: MDPI journal article supplement (doi:10.3390/pathogens11050490), 2022-04-20
Supplement: s1 [file s1]

**Table S3.** Transcripts in the *Ascaris lumbricoides* genome (PRJEB4950) encoding proteins with high identity to isotype 1  $\beta$ -tubulin from *Haemonchus contortus*

| Transcript ID <sup>a</sup>            | Nomenclature<br>Roose et al.<br>[43] | Nomenclature<br>Martin et al.<br>[16] | Annotated<br><i>C. elegans</i><br>ortholog <sup>b</sup> | Length<br>(bp/aa <sup>c</sup> ) | Query<br>coverage <sup>d</sup><br>(%) | Identity <sup>d</sup><br>(%) | Similarity <sup>e</sup><br>(%) | Location genome <sup>e</sup>             | Location<br>cDNA <sup>e</sup> |
|---------------------------------------|--------------------------------------|---------------------------------------|---------------------------------------------------------|---------------------------------|---------------------------------------|------------------------------|--------------------------------|------------------------------------------|-------------------------------|
| ALUE_0000927201-mRNA-1                | bt-A                                 | tbb-5                                 | <i>ben-1</i>                                            | 1344/448                        | 94                                    | 92.9                         | 97.6                           | ALUE_scaffold0000470:57,079-61,212       |                               |
| ALUE_0000986501-mRNA-1                | bt-B                                 | tbb-8b                                | <i>ben-1</i>                                            | 916/305                         | 97                                    | 88.6                         | 94.2                           | ALUE_scaffold0000555:88,104-95,361 (-)   |                               |
| ALUE_0000986501-mRNA-1me <sup>f</sup> | bt-B                                 | tbb-8b                                | <i>ben-1</i>                                            | 1365/455                        | 97                                    | 90.1                         | 96.6                           | ALUE_scaffold0000555:88,107-94241 (-)    |                               |
|                                       |                                      |                                       |                                                         |                                 |                                       |                              |                                | 94241 - 94185 (-)                        | 1 - 57                        |
|                                       |                                      |                                       |                                                         |                                 |                                       |                              |                                | 93345 - 93236 (-)                        | 58-166                        |
|                                       |                                      |                                       |                                                         |                                 |                                       |                              |                                | 92609 - 92283 (-)                        | 167 - 393                     |
|                                       |                                      |                                       |                                                         |                                 |                                       |                              |                                | 91048 - 90918 (-)                        | 394 - 522                     |
|                                       |                                      |                                       |                                                         |                                 |                                       |                              |                                | 90455 - 90293 (-)                        | 523 - 685                     |
|                                       |                                      |                                       |                                                         |                                 |                                       |                              |                                | 89996 - 89806 (-)                        | 686 - 876                     |
|                                       |                                      |                                       |                                                         |                                 |                                       |                              |                                | 89377 - 89282 (-)                        | 877 - 972                     |
|                                       |                                      |                                       |                                                         |                                 |                                       |                              |                                | 88989 - 88803 (-)                        | 973 - 1159                    |
|                                       |                                      |                                       |                                                         |                                 |                                       |                              |                                | 88312 - 88107 (-)                        | 1160 - 1365                   |
| ALUE_0000494801-mRNA-1                | bt-C                                 | tbb-6                                 | <i>ben-1</i>                                            | 1382/462                        | 97                                    | 85.3                         | 94.0                           | ALUE_scaffold0000077:278,876-284,803     |                               |
| ALUE_0000494801-mRNA-1me <sup>f</sup> | bt-C                                 | tbb-6                                 | <i>ben-1</i>                                            | 1350/450                        | 100                                   | 83.5                         | 92.9                           | ALUE_scaffold0000077:278,876-284,800 (+) |                               |
|                                       |                                      |                                       |                                                         |                                 |                                       |                              |                                | 278876 - 278920 (+)                      | 1 – 45                        |
|                                       |                                      |                                       |                                                         |                                 |                                       |                              |                                | 279928 - 280048 (+)                      | 46 - 166                      |
|                                       |                                      |                                       |                                                         |                                 |                                       |                              |                                | 280845 - 281072 (+)                      | 167 - 393                     |
|                                       |                                      |                                       |                                                         |                                 |                                       |                              |                                | 281721 - 281849 (+)                      | 394 - 522                     |
|                                       |                                      |                                       |                                                         |                                 |                                       |                              |                                | 282245 - 282407                          | 523 - 685                     |
|                                       |                                      |                                       |                                                         |                                 |                                       |                              |                                | 282875 - 283065 (+)                      | 686 - 876                     |

|                        |      |       |              |          |    |      |      |                                        |             |
|------------------------|------|-------|--------------|----------|----|------|------|----------------------------------------|-------------|
|                        |      |       |              |          |    |      |      | 283292 - 283387 (+)                    | 877 - 972   |
|                        |      |       |              |          |    |      |      | 283590 - 283776 (+)                    | 973 - 1159  |
|                        |      |       |              |          |    |      |      | 284610 - 284800 (+)                    | 1160 - 1350 |
| ALUE_0001031701-mRNA-1 | bt-D | tbb-7 | <i>ben-1</i> | 1353/451 | 99 | 81.0 | 91.3 | ALUE_scaffold0000629:12,771-18,776 (+) |             |
| ALUE_0000949301-mRNA1  | bt-E | tbb-4 | <i>tbb-4</i> | 1326/442 | 95 | 91.6 | 96.3 | ALUE_scaffold0000501:88,208-98,499 (-) |             |
| ALUE_0000949201-mRNA-1 | bt-F | tbb-3 | <i>mec-7</i> | 1326/442 | 95 | 91.6 | 96.3 | ALUE_scaffold0000501:63,518-77,036 (-) |             |
| ALUE_0001294101-mRNA-1 | bt-G | tbb-9 | <i>ben-1</i> | 1425/475 | 99 | 81.9 | 91.0 | ALUE_scaffold0001173:40,528-50,229 (+) |             |

<sup>a</sup>For each locus, only the best matching transcript was included.

<sup>b</sup>Coding sequence including stop codon in base pairs/amino acids

<sup>c</sup>Using *Haemonchus contortus* isotype 1  $\beta$ -tubulin as query in a TBLASTN search against the cDNA.

<sup>d</sup>Based on the BLOSUM62 similarity matrix.

<sup>e</sup>Details for individual exons are only provided if a different gene model than in the genome annotation was used.

<sup>f</sup>Version after manually editing the cDNA sequence.
