# Supplementary material for: Absence of Polymorphisms in Codons 167, 198 and 200 of All Seven β-Tubulin Isotypes of Benzimidazole Susceptible and Resistant Parascaris spp. Specimens from Australia
Source: MDPI journal article supplement (doi:10.3390/pathogens11050490), 2022-04-20
Supplement: s1 [file s1]

**Table S1.** Transcripts in the *Parascaris univalens* genome (PRJNA386823) encoding proteins with high identity to isotype 1  $\beta$ -tubulin from *Haemonchus contortus*

| Transcript ID <sup>a</sup>    | Nomenclature<br>Roose et al. [43] | Nomenclature<br>Martin et al. [16] | Annotated <i>C.<br/>elegans</i><br>ortholog <sup>b</sup> | Length (bp/aa <sup>c</sup> ) | Query<br>coverage <sup>d</sup> (%) | Identity <sup>d</sup> (%) | Similarity <sup>e</sup> (%) | Location genome <sup>e</sup>       | Location<br>cDNA <sup>e</sup> |
|-------------------------------|-----------------------------------|------------------------------------|----------------------------------------------------------|------------------------------|------------------------------------|---------------------------|-----------------------------|------------------------------------|-------------------------------|
| PgB04_g135_t01                | bt-F                              | tbb-3                              | <i>mec-7</i>                                             | 1329/442                     | 95                                 | 91.3                      | 96.0                        | PgB04:1,953,671-<br>1,964,238 (-)  |                               |
| PgB04_g136_t01 <sup>f,g</sup> | bt-E                              | tbb-4                              | <i>tbb-4</i>                                             | 916/305                      | 68                                 | 92.1                      | 97.7                        |                                    |                               |
| PgB04_g136_t01me <sup>h</sup> | bt-E                              | tbb-4                              | <i>tbb-4</i>                                             | 1278/426                     | 95                                 | 91.5                      | 96.9                        | PgB04:<br>1982336 - 1982392<br>(-) | 1 - 57                        |
|                               |                                   |                                    |                                                          |                              |                                    |                           |                             | 1981706 - 1981814<br>(-)           | 58 - 166                      |
|                               |                                   |                                    |                                                          |                              |                                    |                           |                             | 1981151 - 1981261<br>(-)           | 167 - 277                     |
|                               |                                   |                                    |                                                          |                              |                                    |                           |                             | 1980417 - 1980532<br>(-)           | 278 - 393                     |
|                               |                                   |                                    |                                                          |                              |                                    |                           |                             | 1979909 - 1980037<br>(-)           | 394 - 522                     |
|                               |                                   |                                    |                                                          |                              |                                    |                           |                             | 1979599 - 1979714<br>(-)           | 523 - 638                     |
|                               |                                   |                                    |                                                          |                              |                                    |                           |                             | 1978892 - 1978987<br>(-)           | 639 - 735                     |
|                               |                                   |                                    |                                                          |                              |                                    |                           |                             | 1978310 - 1978409<br>(-)           | 736 - 872                     |
|                               |                                   |                                    |                                                          |                              |                                    |                           |                             | 1977262 - 1977448<br>(-)           | 973 - 1159                    |
|                               |                                   |                                    |                                                          |                              |                                    |                           |                             | 1972810 - 1972928<br>(-)           | 1160 - 1278                   |
| PgB10_g062_t01                | bt-D                              | tbb-7                              | n.a.                                                     | 1356/451                     | 99                                 | 79.8                      | 91.3                        | PgB10:929520 -<br>937009 (+)       |                               |
| PgE153_g002_t01               | bt-C                              | tbb-6                              | n.a.                                                     | 1353/450                     | 100                                | 85.7                      | 94.0                        | PgE153:8,032 -<br>15,428 (+)       |                               |
| PgR003_g161_t04               | bt-B                              | tbb-8b                             | <i>tbb-6</i>                                             | 1368/455                     | 97                                 | 90.8                      | 96.6                        | PgR003:3157208 -<br>3178515 (+)    |                               |
| PgR007_g022_t01               | bt-A                              | tbb-5                              | n.a.                                                     | 1353/450                     | 98                                 | 93.2                      | 97.7                        | PgR007:407010 -<br>413041 (+)      |                               |

|                                |      |       |              |          |    |      |      |                              |             |
|--------------------------------|------|-------|--------------|----------|----|------|------|------------------------------|-------------|
| PgR045_g070_t01                | bt-G | tbb-9 | <i>tbb-6</i> | 1488/495 | 99 | 78.7 | 87.0 | PgR045:1372050 - 1381671 (+) |             |
| PgR045_g070_t01me <sup>f</sup> | bt-G | tbb-9 | <i>tbb-6</i> | 1428/475 | 99 | 82.1 | 90.8 | PgR045:<br>1372050 - 1372106 | 1 - 57      |
|                                |      |       |              |          |    |      |      | (+)                          |             |
|                                |      |       |              |          |    |      |      | 1373392 - 1373500            | 58 - 166    |
|                                |      |       |              |          |    |      |      | (+)                          |             |
|                                |      |       |              |          |    |      |      | 1374127 - 1374353            | 167 - 393   |
|                                |      |       |              |          |    |      |      | (+)                          |             |
|                                |      |       |              |          |    |      |      | 1375326 - 1375454            | 394 - 522   |
|                                |      |       |              |          |    |      |      | (+)                          |             |
|                                |      |       |              |          |    |      |      | 1375747 - 1375909            | 523 - 685   |
|                                |      |       |              |          |    |      |      | (+)                          |             |
|                                |      |       |              |          |    |      |      | 1377235 - 1377425            | 686 - 876   |
|                                |      |       |              |          |    |      |      | (+)                          |             |
|                                |      |       |              |          |    |      |      | 1379551 - 1379646            | 877 - 972   |
|                                |      |       |              |          |    |      |      | (+)                          |             |
|                                |      |       |              |          |    |      |      | 1379832 - 1380018            | 973 - 1159  |
|                                |      |       |              |          |    |      |      | (+)                          |             |
|                                |      |       |              |          |    |      |      | 1381403 - 1381671            | 1160 - 1428 |
|                                |      |       |              |          |    |      |      | (+)                          |             |

<sup>a</sup>For each locus, only the best matching transcript was included.

<sup>b</sup>Coding sequence including stop codon in base pairs/amino acids

<sup>c</sup>Using *Haemonchus contortus* isotype 1  $\beta$ -tubulin as query in a TBLASTN search against the cDNA.

<sup>d</sup>Based on the BLOSUM62 similarity matrix.

<sup>e</sup>Details for individual exons are only provided if a different gene model than in the genome annotation was used.

<sup>f</sup>Version after manually editing the cDNA sequence.

<sup>g</sup>5'- and 3'-ends are missing.

<sup>h</sup>3'-end is missing.
