# Supplementary material for: Absence of Polymorphisms in Codons 167, 198 and 200 of All Seven β-Tubulin Isotypes of Benzimidazole Susceptible and Resistant Parascaris spp. Specimens from Australia
Source: MDPI journal article supplement (doi:10.3390/pathogens11050490), 2022-04-20
Supplement: s1 [file s1]

**Table S5.** Substitution model used for codon-based phylogenetic reconstruction

| Model of substitution                                |                | KOSI07+F+G4    |                |
|------------------------------------------------------|----------------|----------------|----------------|
| State frequencies: (empirical counts from alignment) |                |                |                |
| pi(AAA)=0.0143                                       | pi(AAC)=0.0283 | pi(AAG)=0.0178 | pi(AAT)=0.0241 |
| pi(ACA)=0.0141                                       | pi(ACC)=0.0156 | pi(ACG)=0.0146 | pi(ACT)=0.0134 |
| pi(AGA)=0.0106                                       | pi(AGC)=0.0069 | pi(AGG)=0.0027 | pi(AGT)=0.0053 |
| pi(ATA)=0.0045                                       | pi(ATC)=0.0193 | pi(ATG)=0.0442 | pi(ATT)=0.0196 |
| pi(CAA)=0.0227                                       | pi(CAC)=0.0096 | pi(CAG)=0.0257 | pi(CAT)=0.0123 |
| pi(CCA)=0.0182                                       | pi(CCC)=0.0081 | pi(CCG)=0.0086 | pi(CCT)=0.0089 |
| pi(CGA)=0.0106                                       | pi(CGC)=0.0125 | pi(CGG)=0.0029 | pi(CGT)=0.0136 |
| pi(CTA)=0.0066                                       | pi(CTC)=0.0182 | pi(CTG)=0.0111 | pi(CTT)=0.0218 |
| pi(GAA)=0.0392                                       | pi(GAC)=0.0256 | pi(GAG)=0.0350 | pi(GAT)=0.0337 |
| pi(GCA)=0.0190                                       | pi(GCC)=0.0192 | pi(GCG)=0.0109 | pi(GCT)=0.0204 |
| pi(GGA)=0.0300                                       | pi(GGC)=0.0220 | pi(GGG)=0.0049 | pi(GGT)=0.0226 |
| pi(GTA)=0.0098                                       | pi(GTC)=0.0175 | pi(GTG)=0.0208 | pi(GTT)=0.0205 |
| pi(TAC)=0.0186                                       | pi(TAT)=0.0166 | pi(TCA)=0.0119 | pi(TCC)=0.0114 |
| pi(TCG)=0.0133                                       | pi(TCT)=0.0100 | pi(TGC)=0.0104 | pi(TGG)=0.0092 |
| pi(TGT)=0.0090                                       | pi(TTA)=0.0044 | pi(TTC)=0.0356 | pi(TTG)=0.0151 |
| pi(TTT)=0.0168                                       |                |                |                |
| Model of rate heterogeneity: Gamma with 4 categories |                |                |                |
| Gamma shape alpha:                                   | 509.515        |                |                |
| Category                                             | Relative_rate  | Proportion     |                |
| 1                                                    | 0.8280         | 0.2500         |                |
| 2                                                    | 0.9491         | 0.2500         |                |
| 3                                                    | 10.397         | 0.2500         |                |
| 4                                                    | 11.832         | 0.2500         |                |

Relative rates are computed as MEAN of the portion of the Gamma distribution falling in the category.
