# Supplementary material for: Absence of Polymorphisms in Codons 167, 198 and 200 of All Seven β-Tubulin Isotypes of Benzimidazole Susceptible and Resistant Parascaris spp. Specimens from Australia
Source: Pathogens. 2022 Apr 20;11(5):490. doi: 10.3390/pathogens11050490 (PMC9143322; doi:10.3390/pathogens11050490)
Supplement: Supplementary file 1 [file pathogens-11-00490-s001.zip]

Archive with 7 entries (7 files):
- pathogens-1673919-supplementary/Figure S1.pdf
- pathogens-1673919-supplementary/Table S1.pdf
- pathogens-1673919-supplementary/Table S2.pdf
- pathogens-1673919-supplementary/Table S3.pdf
- pathogens-1673919-supplementary/Table S4.pdf
- pathogens-1673919-supplementary/Table S5.pdf
- pathogens-1673919-supplementary/Table S6.pdf
